# Supplementary material for: Double-channel emission from gold nanoparticles functionalized with a thermo-responsive copolymer ligand: preparation, optical properties and control of catalytic activity
Source: Royal Society of Chemistry journal article supplement (doi:10.1039/c6ra17690a), 2016-01-01
Supplement: c6ra17690a1.pdf [file c6ra17690a1.pdf]

Supporting Information for *RSC Advances*.

## Electronic Supporting Information

**Double channel emission from gold nanoparticles functionalized with thermo-responsive copolymer ligand: preparation, optical properties and control of catalytic activity**

**Dongmei Wang, Bingxin Liu, Jianhua Lü and Changli Lü\***

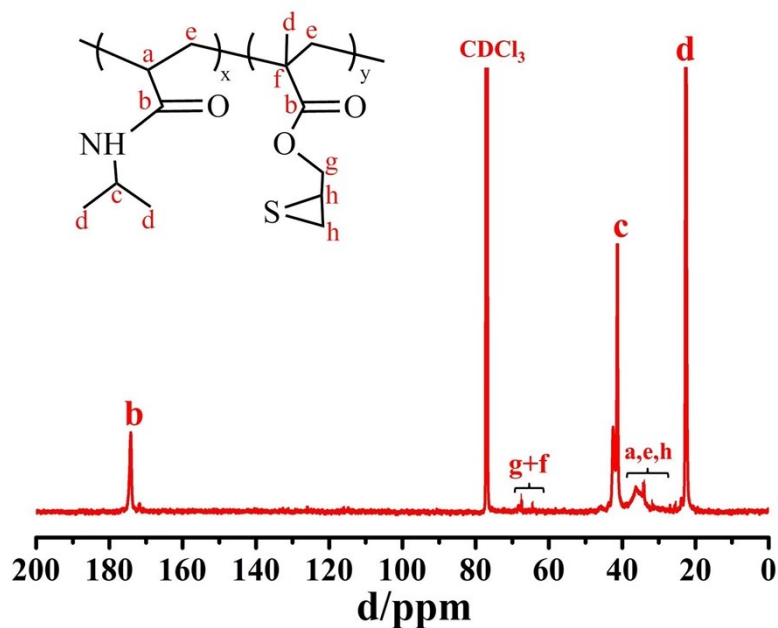

Fig. S1 <sup>13</sup>C-NMR spectrum of P(NIPAM-co-ETMA) in CDCl<sub>3</sub>.

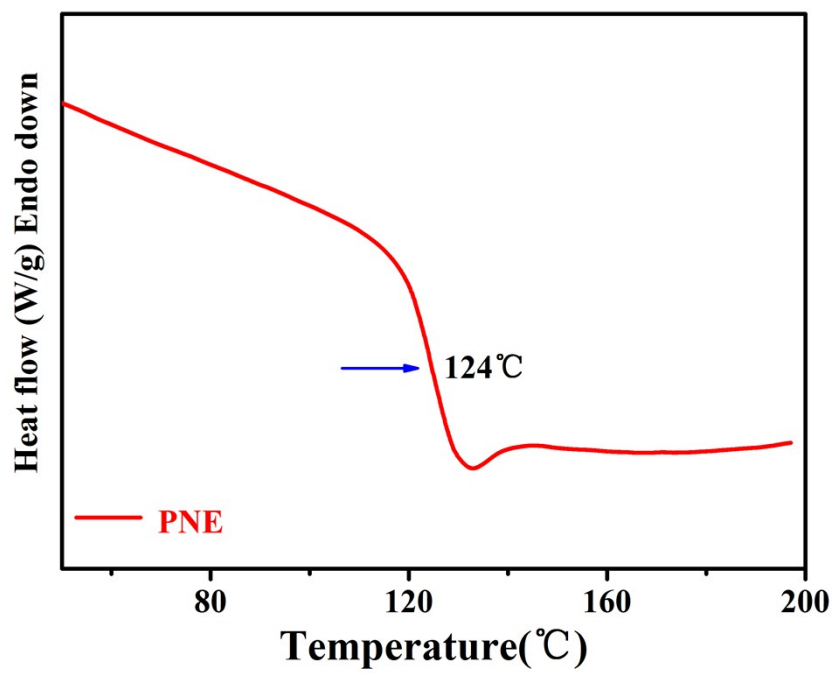

Fig. S2 DSC curve of PNE.

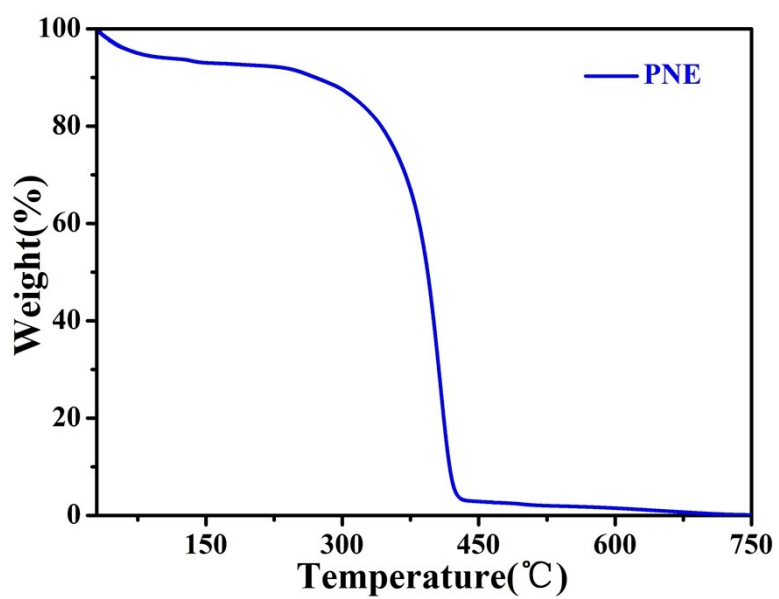

Fig. S3 TGA curve of PNE.

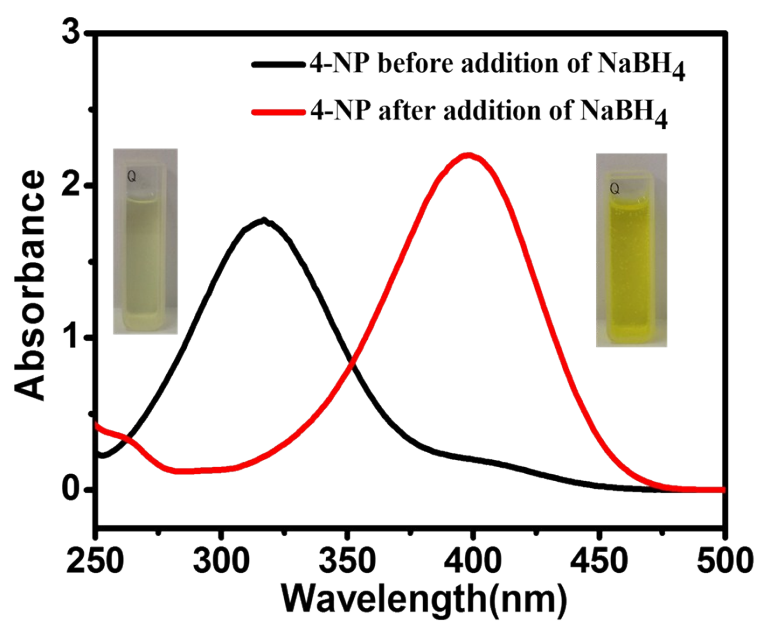

Fig. S4 UV-vis spectra of 4-nitrophenol solution before and after the addition of NaBH<sub>4</sub>.

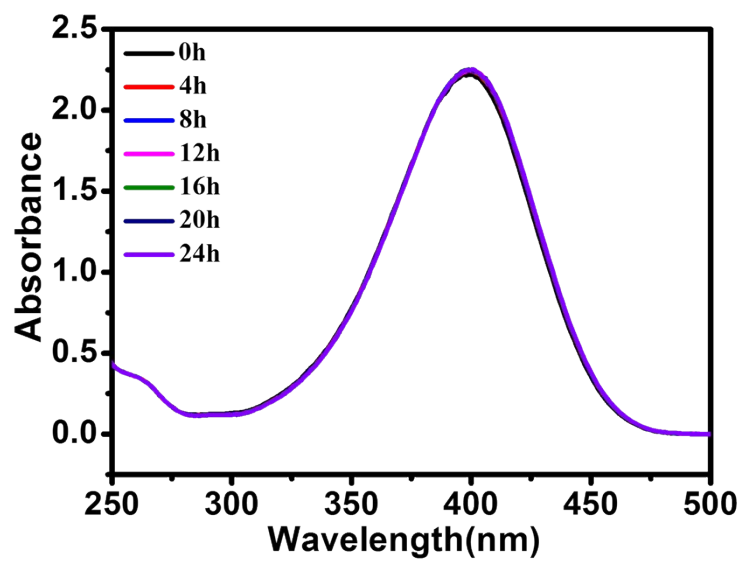

Fig. S5 UV-vis spectra of 4-nitrophenol solution with  $\text{NaBH}_4$  without Au NPs @PNE catalyst

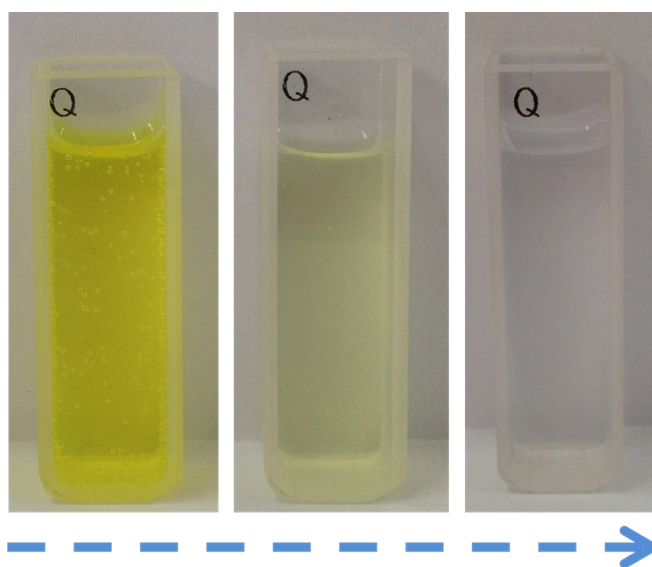

Fig. S6 Color change form yellow to colorless for 4-nitrophenol solution with  $\text{NaBH}_4$  using Au NPs @PNE-b2 as catalyst.
